# Supplementary material
Source: PubMed Central journal article supplement (PMC6450274)
Supplement: jamapediatr-173-319-s001.pdf [file jamapediatr-173-319-s001.pdf]

**University at Buffalo Institutional Review Board (UBIRB)**

Office of Research Compliance | Clinical and Translational Research Center Room 5018

875 Ellicott St. | Buffalo, NY 14203

UB Federalwide Assurance ID#: FWA00008824

PROTOCOL TITLE: *A Randomized Controlled Trial of Exercise Treatment for Concussion*

1

2

**PROTOCOL TITLE:**

3

*Include the full protocol title.*

4

Response: A Randomized Controlled Trial of Exercise Treatment for Concussion

5

6

7

**PRINCIPAL INVESTIGATOR:**

8

*Name*

9

*Department*

10

*Telephone Number*

11

*Email Address*

12

Response: John Leddy MD. Orthopaedics. 716-829-5501.

13

leddy@buffalo.edu

14

15

**VERSION NUMBER:**

16

*Include the version number of this protocol.*

17

Response: 1

18

19

**DATE:**

20

*Include the date of submission or revision.*

21

Response: June 9, 2015

22

23

**Grant Applicability:**

24

*Describe whether or not this protocol is funded by a grant or contract and if so, what portions of the grant this study covers.*

25

26

27

28

|    |                                                                             |    |
|----|-----------------------------------------------------------------------------|----|
| 29 | <b>Table of Contents</b>                                                    |    |
| 30 | 1.0 Objectives .....                                                        | 3  |
| 31 | 2.0 Background .....                                                        | 3  |
| 32 | 3.0 Inclusion and Exclusion Criteria.....                                   | 6  |
| 33 | 4.0 Study-Wide Number of Subjects (Multisite/Multicenter Only) .....        | 8  |
| 34 | 5.0 Study-Wide Recruitment Methods (Multisite/Multicenter Only).....        | 8  |
| 35 | 6.0 Multi-Site Research (Multisite/Multicenter Only).....                   | 9  |
| 36 | 7.0 Study Timelines .....                                                   | 10 |
| 37 | 8.0 Study Endpoints.....                                                    | 10 |
| 38 | 9.0 Procedures Involved.....                                                | 10 |
| 39 | 10.0 Data and Specimen Banking.....                                         | 13 |
| 40 | 11.0 Data Management .....                                                  | 13 |
| 41 | 12.0 Provisions to Monitor the Data and Ensure the Safety of Subjects ..... | 16 |
| 42 | 13.0 Withdrawal of Subjects.....                                            | 17 |
| 43 | 14.0 Risks to Subjects .....                                                | 17 |
| 44 | 15.0 Potential Benefits to Subjects .....                                   | 19 |
| 45 | 16.0 Vulnerable Populations.....                                            | 19 |
| 46 | 17.0 Community-Based Participatory Research .....                           | 20 |
| 47 | 18.0 Sharing of Results with Subjects .....                                 | 20 |
| 48 | 19.0 Setting .....                                                          | 20 |
| 49 | 20.0 Resources Available.....                                               | 21 |
| 50 | 21.0 Prior Approvals.....                                                   | 22 |
| 51 | 22.0 Recruitment Methods.....                                               | 22 |
| 52 | 23.0 Local Number of Subjects .....                                         | 23 |
| 53 | 24.0 Confidentiality .....                                                  | 23 |
| 54 | 25.0 Provisions to Protect the Privacy Interests of Subjects.....           | 24 |
| 55 | 26.0 Compensation for Research-Related Injury.....                          | 24 |
| 56 | 27.0 Economic Burden to Subjects.....                                       | 25 |
| 57 | 28.0 Consent Process .....                                                  | 25 |
| 58 | 29.0 Process to Document Consent in Writing .....                           | 29 |
| 59 | 30.0 Drugs or Devices.....                                                  | 29 |
| 60 |                                                                             |    |
| 61 |                                                                             |    |

62 **1.0 Objectives**

63 *1.1 Describe the purpose, specific aims, or objectives.*

64 Response: To determine the efficacy of early exercise treatment in patients  
65 with concussion.

66  
67 *1.2 State the hypotheses to be tested.*

68 Response: We hypothesize that sub-threshold aerobic exercise as opposed  
69 to placebo stretching will speed recovery in patients acutely after  
70 concussion.

71

72 **2.0 Background**

73 *2.1 Describe the relevant prior experience and gaps in current*  
74 *knowledge.*

75 Response: We are the first group in the world to use exercise safely for  
76 treatment of humans with post-concussion syndrome. There are no data on  
77 the use of exercise treatment in the acute phase of concussion recovery.  
78 We recently completed an RCT that evaluated whether it was safe to test  
79 exercise tolerance in adolescents. We found that it was perfectly safe to do  
80 so and that the heart rate achieved on the early treadmill test predicted  
81 who would recover in two weeks vs. those who would not.

82 *2.2 Describe any relevant preliminary data.*

83 **Response:**

84 We have published on the safety, efficacy and long-term prognosis of sub-  
85 threshold exercise treatment in patients with physiological post-  
86 concussion disorder.

87 In a recent study, 41 adolescents (mean age 15.8, range 14-19 years) with  
88 recent SRC (mean 5.2 days since injury, range 1-10 days) were randomly  
89 assigned to treadmill testing or not when first seen in clinic (Day 1).  
90 Participants had ImPACT testing, completed a symptom checklist, and  
91 reported symptoms daily on a dedicated website. All participants had  
92 treadmill testing on follow up (2 weeks after Day 1). Heart rate (HR) and  
93 perceived exertion (RPE) at symptom exacerbation threshold on the  
94 treadmill determined level of exercise tolerance. Linear regression  
95 analysis determined which variables predicted recovery, defined as being  
96 asymptomatic, exercise tolerant (i.e., 17 or above on the Borg RPE scale),  
97 and receiving a positive evaluation after a blinded physician assessment.

98 **Results:** On follow up, 14/19 participants randomized to treadmill and  
99 18/22 participants randomized to no treadmill had normal exercise  
100 tolerance and were assessed as recovered by the physician. There was no  
101 significant difference in the daily symptom reports between the two

102 groups. Gender, age, number of prior concussions, symptom severity and  
103 ImPACT scores on Day 1 did not predict recovery at two weeks. In the  
104 Day 1 treadmill group, HR at threshold was the only variable that  
105 predicted recovery by Day 14 ( $R^2 = 0.514$ ;  $p=.001$ ). All participants whose  
106 Day 1 threshold HR exceeded 130 bpm recovered by 14 days.

107 **Conclusions:** Early systematic evaluation of exercise tolerance in  
108 adolescents with SRC did not delay recovery. The degree of exercise  
109 intolerance early after SRC strongly predicted recovery at follow up.

110 **Significance:** Exercise tolerance can safely be assessed early after SRC to  
111 establish short-term prognosis for recovery. The logical next step is to use  
112 sub-threshold exercise in those with exercise intolerance to see if it speeds  
113 recovery versus traditional therapy (rest).

114 *2.3 Provide the scientific or scholarly background for, rationale for, and*  
115 *significance of the research based on the existing literature and how will it*  
116 *add to existing knowledge.*

117 Response: We have developed a standard treadmill test that is the only  
118 functional test thus far shown to safely<sup>1</sup> and reliably<sup>2</sup> diagnose physiologic  
119 dysfunction in concussion, differentiate it from other diagnoses (e.g.,  
120 cervical/vestibular injury, depression, migraines)<sup>3</sup>, and quantify the  
121 clinical severity and exercise capacity of concussed patients.<sup>1,2</sup> Animal  
122 research shows that exercise is beneficial to cognitive recovery if  
123 administered three or more weeks after concussion.<sup>4,5</sup> We were the first  
124 group to treat human PCS patients with individualized aerobic exercise  
125 and to demonstrate that the program could safely speed recovery and  
126 restore function (sport and work).<sup>1,3</sup> There is evidence of altered  
127 autonomic nervous system (ANS) balance and control of cerebral blood  
128 flow (CBF) in concussion.<sup>6</sup> In a recent controlled study, we showed that  
129 exercise treatment restored normal local CBF regulation, as indicated by  
130 functional MRI (fMRI) activation, versus a placebo stretching  
131 intervention, in association with improved aerobic capacity and resolution  
132 of symptoms.<sup>7</sup> Some concussion symptoms may therefore be related to  
133 abnormal CBF regulation that is amenable to individualized aerobic  
134 exercise treatment. The traditional therapy for concussion is rest. Physical  
135 deconditioning as a result of rest reduces control of CBF<sup>8</sup> whereas exercise  
136 training has beneficial effects on CBF control<sup>9</sup> and restores ANS  
137 balance.<sup>10</sup> The ability to exercise to exhaustion on a treadmill test without  
138 symptom exacerbation defines physiologic recovery from concussion,  
139 which conforms to expert consensus opinion.<sup>11</sup> Individualized exercise  
140 treatment for concussion patients results in greater than 50% improvement  
141 versus controls and is well accepted as < 10% of subjects refuse exercise  
142 treatment.<sup>3</sup>

143 Concomitant injury to the cervical spine resembling whiplash may occur  
144 as a result of the acceleration-deceleration forces sustained in concussive  
145 trauma.<sup>12</sup> Structural and functional injury to the cervical spine can be

146 associated with prolonged symptoms such as headache, dizziness, blurred  
147 vision and vertigo.<sup>13,14</sup> Cognitive complaints, including poor concentration  
148 and memory deficits have also been reported following whiplash injury.<sup>15</sup>  
149 Symptoms such as headache, dizziness, poor memory, and vertigo may  
150 therefore result either from a brain injury, from injury to the cervical  
151 spine, or from both. Accurate and early detection of concomitant neck  
152 injury and/or vestibular/ocular abnormalities in concussed patients could  
153 allow for the appropriate direction of cervical spine and vestibular therapy,  
154 which has the potential to reduce symptoms and speed recovery.<sup>16</sup>

155 The therapeutic promise of aerobic and vestibular exercise for concussion  
156 recovery should be tested in a randomized controlled trial (RCT).

157 *2.3 Include complete specific citations/references.*

158 Response:

- 159 1. Leddy JJ, Kozlowski K, Donnelly JP, Pendergast DR, Epstein LH, Willer B. A  
160 preliminary study of subsymptom threshold exercise training for refractory post-  
161 concussion syndrome. *Clinical Journal of Sport Medicine*. 2010;20(1):21-27.
- 162 2. Leddy JJ, Baker JG, Kozlowski K, Bisson L, Willer B. Reliability of a graded  
163 exercise test for assessing recovery from concussion. *Clin J Sport Med*.  
164 2011;21(2):89-94.
- 165 3. Baker JG, Freitas MS, Leddy JJ, Kozlowski KF, Willer BS. Return to full  
166 functioning after graded exercise assessment and progressive exercise treatment  
167 of postconcussion syndrome. *Rehabilitation research and practice*.  
168 2012;2012:705309.
- 169 4. Griesbach GS, Gomez-Pinilla F, Hovda DA. The upregulation of plasticity-related  
170 proteins following TBI is disrupted with acute voluntary exercise. *Brain Res*.  
171 2004;1016(2):154-162.
- 172 5. Griesbach GS, Hovda DA, Molteni R, Wu A, Gomez-Pinilla F. Voluntary  
173 exercise following traumatic brain injury: brain-derived neurotrophic factor  
174 upregulation and recovery of function. *Neuroscience*. 2004;125(1):129-139.
- 175 6. Leddy JJ, Kozlowski K, Fung M, Pendergast DR, Willer B. Regulatory and  
176 autoregulatory physiological dysfunction as a primary characteristic of post  
177 concussion syndrome: implications for treatment. *NeuroRehabilitation*.  
178 2007;22(3):199-205.
- 179 7. Leddy JJ, Cox JL, Baker JG, et al. Exercise Treatment for Postconcussion  
180 Syndrome: A Pilot Study of Changes in Functional Magnetic Resonance Imaging  
181 Activation, Physiology, and Symptoms. *J Head Trauma Rehabil*. 2012.
- 182 8. Zhang R, Zuckerman JH, Pawelczyk JA, Levine BD. Effects of head-down-tilt  
183 bed rest on cerebral hemodynamics during orthostatic stress. *J Appl Physiol*.  
184 1997;83(6):2139-2145.
- 185 9. Alderman BL, Arent SM, Landers DM, Rogers TJ. Aerobic exercise intensity and  
186 time of stressor administration influence cardiovascular responses to  
187 psychological stress. *Psychophysiology*. 2007;44(5):759-766.
- 188 10. Kozlowski KF, Graham J, Leddy JJ, Devinney-Boymel L, Willer BS. Exercise  
189 Intolerance in Individuals With Postconcussion Syndrome. *J Athl Train*. 2013.

- 190 11. McCrory P, Meeuwisse W, Johnston K, et al. Consensus statement on Concussion  
 191 in Sport 3rd International Conference on Concussion in Sport held in Zurich,  
 192 November 2008. *Clinical Journal of Sport Medicine*. 2009;19(3):185-200.
- 193 12. Barth JT, Freeman JR, Broshek DK, Varney RN. Acceleration-Deceleration  
 194 Sport-Related Concussion: The Gravity of It All. *J Athl Train*. 2001;36(3):253-  
 195 256.
- 196 13. Endo K, Ichimaru K, Komagata M, Yamamoto K. Cervical vertigo and dizziness  
 197 after whiplash injury. *Eur Spine J*. 2006;15(6):886-890.
- 198 14. Treleaven J. Dizziness, unsteadiness, visual disturbances, and postural control:  
 199 implications for the transition to chronic symptoms after a whiplash trauma. *Spine*  
 200 (*Phila Pa 1976*). 2011;36(25 Suppl):S211-217.
- 201 15. Sturzenegger M, Radanov BP, Winter P, Simko M, Farra AD, Di Stefano G.  
 202 MRI-based brain volumetry in chronic whiplash patients: no evidence for  
 203 traumatic brain injury. *Acta Neurol Scand*. 2008;117(1):49-54.
- 204 16. Schneider KJ, Iverson GL, Emery CA, McCrory P, Herring SA, Meeuwisse WH.  
 205 The effects of rest and treatment following sport-related concussion: a systematic  
 206 review of the literature. *Br J Sports Med*. 2013;47(5):304-307.
- 207 17. Lovell MR, Iverson GL, Collins MW, et al. Measurement of symptoms following  
 208 sports-related concussion: reliability and normative data for the post-concussion  
 209 scale. *Appl Neuropsychol*. 2006;13(3):166-174.
- 210 18. *ACSM's Guidelines for Exercise Testing and Prescription* 7th ed. Philadelphia:  
 211 Lippincott Williams & Wilkins; 2006.
- 212 19. Leddy JJ, Cox JL, Baker JG, et al. Exercise treatment for postconcussion  
 213 syndrome: a pilot study of changes in functional magnetic resonance imaging  
 214 activation, physiology, and symptoms. *J Head Trauma Rehabil*. 2013;28(4):241-  
 215 249.

216

### 217 3.0 Inclusion and Exclusion Criteria

218 3.1 Describe the criteria that define who will be included or excluded in  
 219 your final study sample.

220 Response:

#### 221 Inclusion Criteria:

- 222 1. Age **10-18 years**. Any race, ethnicity, or sex. Civilian or US Veteran.  
 223 Concussion within 10 days of first clinic visit.
- 224 2. Symptom score >5 on the Post-Concussion Scale (PCS).<sup>17</sup>
- 225 3. Low risk for cardiac disease (defined as no cardiopulmonary symptoms  
 226 and meet no more than one risk factor for heart disease).<sup>18</sup>
- 227 4. Submaximal symptom-limited threshold on the Buffalo Concussion  
 228 Treadmill Test.<sup>1</sup>
- 229 5. Willing to exercise.
- 230 6. Medications, except for beta-blockers, are acceptable.

231

**Exclusion Criteria:**

232

1. Glasgow Coma Scale (GCS) score <12 at time of injury. Justification: indicates moderate or severe TBI.

233

234

2. Lesion on CT/MRI (via review of emergency room medical records) and/or focal neurologic deficit. Justification: indicates moderate or severe TBI.

235

236

237

3. Inability to exercise because of orthopedic injury, significant vestibular dysfunction, visual abnormality, or increased cardiac risk. Justification: unsafe to perform treadmill test or provide exercise as treatment.

238

239

240

4. beta-blocker use. Justification: affects autonomic function, reduces exercise capacity and blunts exercise heart rate, invalidating interpretation of the treadmill test.

241

242

243

5. Major depression. Justification: affects autonomic function, unlikely to comply with intervention.

244

245

6. Unwilling to exercise. Justification: will not be compliant with intervention or control condition.

246

247

7. Cannot understand English. Justification: cannot be compliant with intervention.

248

249

*3.2 Describe how individuals will be screened for eligibility.*

250

Response: Patients will be screened for eligibility at the UB Concussion Management Clinics in Buffalo and in Niagara Falls. Potential subjects will be identified after a standard clinical evaluation that consists of a thorough history and physical examination by physicians with extensive experience in concussion management. They will sign informed consent and have the opportunity to ask questions.

251

252

253

254

255

256

*Indicate specifically whether you will include or exclude each of the following special populations: (You may not include members of these populations as subjects in your research unless you indicate this in your inclusion criteria.)*

257

258

259

260

- *Adults unable to consent*

261

- *Individuals who are not yet adults (infants, children, teenagers)*

262

- *Pregnant women*

263

- *Prisoners*

264

Response:

265

Children and teenagers. Inclusion is justified since this is the population that suffers the highest incidence of sport-related concussion in the US and for whom valid and objective physiological data would improve concussion diagnosis and reduce the risk of returning these athletes to sport or cognitive activity prematurely. The risk of the study to this age

266

267

268

269

270 group is minimal. Safeguards in place to protect the rights and welfare of  
271 these vulnerable subjects include parental consent and assent of the child;  
272 daily recording of symptoms; regular visits with the treating physician and  
273 our clinical and research experience evaluating and treating concussed  
274 children and students on a regular basis with excellent results.

275 3.3 *Indicate whether you will include non-English speaking individuals.*  
276 *Provide justification if you will exclude non-English speaking*  
277 *individuals.*  
278 *(In order to meet one of the primary ethical principles of equitable*  
279 *selection of subjects, non-English speaking individuals may not be*  
280 *routinely excluded from research. In cases where the research is of*  
281 *therapeutic intent or is designed to investigate areas that would*  
282 *necessarily require certain populations who may not speak English,*  
283 *the researcher is required to make efforts to recruit and include non-*  
284 *English speaking individuals. However, there are studies in which it*  
285 *would be reasonable to limit subjects to those who speak English:*  
286 *e.g., pilot studies, small unfunded studies with validated instruments*  
287 *not available in other languages, numerous questionnaires, and*  
288 *some non-therapeutic studies which offer no direct benefit.)*

289 Response: We will exclude non-English speaking subjects because this is  
290 an unfunded study that requires fluent English to follow instructions  
291 during the treadmill test, complete the required questionnaires, and  
292 comply with the exercise intervention.

293

#### 294 **4.0 Study-Wide Number of Subjects (Multisite/Multicenter Only)**

295 4.1 *If this is a multicenter study, indicate the total number of subjects to*  
296 *be accrued across all sites.*

297 Response:

298 Using our published data on rate of recovery with exercise treatment in  
299 concussion,<sup>1,7</sup> and our pilot data on rate of recovery in subjects aged 14-19  
300 years, we calculate that **50** subjects in each treatment group (exercise or  
301 stretching) will be sufficient for the Primary Aim of time to physiologic  
302 recovery. Analyses will be on a per protocol basis. Based on our pilot  
303 work,<sup>1,7</sup> we estimate a potential 10% attrition rate so we will enroll **55**  
304 subjects into each category for a total of **N = 110 subjects**.

305 *Study-Wide Recruitment Methods (Multisite/Multicenter Only)*

306 *If this is a multicenter study and subjects will be recruited by methods not under*  
307 *the control of the local site (e.g., call centers, national advertisements) describe*  
308 *those methods. Local recruitment methods are described later in the protocol.*

309 4.2 *Describe when, where, and how potential subjects will be recruited.*

310 Response: Patients will be screened for eligibility at the UB Concussion  
311 Management Clinics in Buffalo and in Niagara Falls. Potential subjects



312 will be identified after a standard clinical evaluation that consists of a  
313 thorough history and physical examination by physicians with extensive  
314 experience in concussion management.

315 4.3 *Describe the methods that will be used to identify potential subjects.*

316 Response:

317 These concussion centers receive referrals from other doctors, emergency  
318 rooms and athletic trainers. Clinic patients satisfying inclusion criteria will  
319 be approached for participation.

320 Identification of potential human subjects: study physicians at each site.

321 Recruitment: study coordinators and research assistants at each site.

322 Methods of recruitment: physicians at each site will identify potential  
323 subjects and refer them to the study coordinators and research assistants  
324 for a description of the study and opportunity to ask questions. The  
325 potential subject will be screened against this projects' Inclusion and  
326 Exclusion criteria. If the subject fits these requirements, the study  
327 coordinator will explain the project and answer questions before the  
328 subject signs the consent form. Prospective subjects and, if appropriate,  
329 the parent or LAR, will have a 15 minute waiting period to consider  
330 enrollment.

331 4.4 *Describe materials that will be used to recruit subjects. (Attach*  
332 *copies of these documents with the application. For advertisements,*  
333 *attach the final copy of printed advertisements. When advertisements*  
334 *are taped for broadcast, attach the final audio/video tape. You may*  
335 *submit the wording of the advertisement prior to taping to preclude*  
336 *re-taping because of inappropriate wording, provided the IRB*  
337 *reviews the final audio/video tape.)*

338 Response: Not applicable.

## 339 **5.0 Multi-Site Research (Multisite/Multicenter Only)**

340 5.1 *If this is a multi-site study where you are the lead investigator,*  
341 *describe the processes to ensure communication among sites, such*  
342 *as:*

- 343 • *All sites have the most current version of the protocol, consent*  
344 *document, and HIPAA authorization.*
- 345 • *All required approvals have been obtained at each site*  
346 *(including approval by the site's IRB of record).*
- 347 • *All modifications have been communicated to sites, and*  
348 *approved (including approval by the site's IRB of record)*  
349 *before the modification is implemented.*
- 350 • *All engaged participating sites will safeguard data as required*  
351 *by local information security policies.*
- 352 • *All local site investigators conduct the study appropriately.*

- 353                   •    *All non-compliance with the study protocol or applicable*  
354                            *requirements will be reported in accordance with local policy.*

355                   Response: Not applicable

356

357                   5.2    *Describe the method for communicating to engaged participating*  
358                            *sites:*

- 359                   •    *Problems.*  
360                   •    *Interim results.*  
361                   •    *The closure of a study*

362                   Response: Not applicable

## 363    **6.0    Study Timelines**

364                   6.1    *Describe the duration of an individual subject's participation in the*  
365                            *study.*

366                   Response: 3-5 weeks.

367

368                   6.2    *Describe the duration anticipated to enroll all study subjects.*

369                   Response: 24 months

370

371                   6.3    *Describe the estimated date for the investigators to complete this*  
372                            *study (complete primary analyses)*

373                   Response: 6/30/17

374

## 375    **7.0    Study Endpoints**

376                   7.1    *Describe the primary and secondary study endpoints.*

377                   Response:

378                   1. Time to concussion recovery, which is defined as reporting a normal  
379                   level of symptoms; exercise tolerant (i.e., cycle or treadmill exercise to 17  
380                   or above on the Borg RPE scale without symptom exacerbation); and  
381                   receiving confirmation of normal physical examination by blinded  
382                   physician assessment.

383                   2. Incidence of delayed recovery ( $\geq 30$  days) between the groups.

384

385                   7.2    *Describe any primary or secondary safety endpoints.*

386                   Response: Symptom reports between the intervention and control groups.

## 387    **8.0    Procedures Involved**

388  
389  
390  
391  
392  
393  
394  
395  
396  
397  
398  
399  
400  
401  
402  
403  
404  
405  
406  
407  
408  
409  
410  
411  
412  
413  
414  
415  
416  
417  
418  
419  
420  
421  
422  
423  
424  
425  
426  
427  
428  
429  
430  
431

*8.1 Describe and explain the study design.*

Response: Randomized controlled trial of sub-threshold aerobic exercise therapy versus placebo stretching in subjects in the acute phase after concussion.

*8.2 Provide a description of all research procedures being performed and when they are performed, including procedures being performed to monitor subjects for safety or minimize risks.*

Response:

Visit 1: If eligible, and after consent, subjects and controls will fill out a standardized concussion symptom checklist and subjects will be tested for exercise tolerance on a treadmill on day of enrollment with pre-determined stopping criteria. Those who achieve a HR > 150 bpm will be excluded from the study since, based upon our pilot data, they are close to full recovery. Those who achieve a HR > 120 but < 160 bpm and who cannot exercise to exhaustion (defined by RPE < 17) will be randomly assigned to sub-threshold aerobic exercise or to a stretching program (keeping HR near resting levels). Those who do not achieve a HR > 120 bpm will return in one week for a repeat treadmill test (Visit 2). If they achieve HR > 120 bpm but cannot exercise to exhaustion at Visit 2 (i.e., exercise intolerant), they will be randomly assigned to sub-threshold aerobic exercise or to a stretching program (keeping HR near resting levels). This strategy is based on our pilot data showing that subjects who do not achieve HR > 120 bpm at Time 1 typically require a week of rest to achieve that level. Furthermore, subjects must be able to demonstrate some level of exercise tolerance to have a reasonable sub-threshold (80% of achieved HR) exercise treatment prescription.

Subjects randomized to aerobic exercise treatment will be given an HR monitor and a specific HR intensity to perform 30 minutes per day. They will be prompted by text/email to do their exercise at the same time each day. Subjects randomized to stretching will be given a written progressive stretching program and contacted by text/email each day to document that they have stretched for 30 minutes per day (and that they have not participated in structured aerobic exercise during the entire study). After randomization to treatment group, all subjects will be seen weekly for up to 3 weeks (Visits 3-5) to have treadmill testing and complete a cognitive activity questionnaire to determine physiological recovery.

At each study visit, participants will be administered the King-Devick (K-D) test for impairment in saccadic eye movements immediately prior to, and following, testing for exercise intolerance. Saccadic and other types of eye movements are frequently abnormal in patients following concussion, and the K-D test is a brief (2 minute) task that objectively measures subcortical pathways. Participants will be given the K-D test, while standing, before the start of exercise. Five minutes after completion of the treadmill test, the K-D test will be repeated.

432 All subjects will be prompted to enter their symptom data into a form on a  
433 dedicated website between 7-10 PM each evening (after that day's  
434 exercise, for those in the exercise group).

435 Based on our pilot work, it is extremely difficult to retain subjects once  
436 they have recovered from concussion. Therefore, the study is over for each  
437 subject at recovery (defined as at a normal symptom level and normal  
438 exercise tolerance) or at 4 weeks post randomization (Visit 5), with the  
439 assumption that the majority of subjects will have recovered by Visit 5  
440 (which is true for >80% based upon our pilot work).

441 To monitor for risk, subjects will report symptoms daily to a dedicated  
442 website (with text reminders to report between 7 and 10 PM each day) and  
443 can text the RAs with any concerns. They will be instructed that there may  
444 be temporary exacerbation of symptoms on some days with aerobic or  
445 stretching exercise and to stop exercise if that occurs and simply wait until  
446 the following day to resume. We have been very successful with this  
447 approach in our clinical practice and in our published studies.<sup>3,4,7</sup>

448 *8.3 Describe procedures performed to lessen the probability or*  
449 *magnitude of risks.*

450 Response:

451 The risk of treadmill testing is minimal since two research assistants  
452 (RAs) conduct the test and we have pre-determined stopping criteria for  
453 the symptom-exacerbation threshold. The risk of sub-threshold exercise is  
454 minimal since the exercise intensity is controlled closely by the HR  
455 monitor and is one that they achieved safely at the time of the initial  
456 treadmill test. The risk of a gently progressive stretching program is  
457 minimal. Subjects with vestibular signs who are not safe for treadmill  
458 exercise will have exercise tolerance determined by stationary cycle, again  
459 with two RAs present.

460 *8.4 Describe all drugs and devices used in the research and the purpose*  
461 *of their use, and their regulatory approval status.*

462 Response: Standard treadmill or stationary cycle to assess exercise  
463 capacity and HR monitor to wear at home during exercise treatment  
464 sessions to ensure proper exercise intensity is not exceeded.

465 *8.5 Describe the source records that will be used to collect data about*  
466 *subjects. (Attach all surveys, scripts, and data collection forms.)*

467 Response: Validated concussion symptom checklist and a recording form  
468 for treadmill or cycle exercise (**see attached**). Physical examination by an  
469 experienced physician using a standardized reporting form. *What data will*  
470 *be collected including long-term follow-up.*

471 Response: Heart rate, level of exercise tolerance, and concussion  
472 symptoms.

473

474 8.6 For HUD uses provide a description of the device, a summary of  
475 how you propose to use the device, including a description of any  
476 screening procedures, the HUD procedure, and any patient follow-  
477 up visits, tests or procedures.

478 Response: Not applicable.

479

## 480 9.0 Data and Specimen Banking

481 9.1 If data or specimens will be banked for future use, describe where  
482 the data/specimens will be stored, how long they will be stored, how  
483 the data/specimens will be accessed, and who will have access to the  
484 data/specimens.

485 Response: Not applicable.

486

487 9.2 List the data to be stored or associated with each specimen.

488 Response: Not applicable.

489

490 9.3 Describe the procedures to release data or specimens, including: the  
491 process to request a release, approvals required for release, who  
492 can obtain data or specimens, and the data to be provided with  
493 specimens.

494 Response: Not applicable.

495

## 496 10.0 Data Management

497 10.1 Describe the data analysis plan, including any statistical  
498 procedures.

499 Analyses will be based on per protocol analysis. Baseline characteristics  
500 will be analyzed to assess cluster differences between aerobic and  
501 stretching groups. We will assess group-wise differences in normally  
502 distributed variables (age, total physical examination findings, total  
503 symptom severity scores on initial visit, and days to initial visit) using  
504 ANOVA. Chi-square test will be used to assess group-wise differences in  
505 sex and prior concussions. The Mann-Whitney test will be used for the  
506 main outcome measure (days to recovery). We will use Kaplan-Meier  
507 curves and multivariable Cox proportional hazards models adjusted for  
508 patient characteristics (age, sex, prior concussion, and time since injury).  
509 Mean daily symptom severity score with 95% CI for the first three weeks  
510 will be considered in linear regression models and distributional checks of  
511 residuals undertaken to determine the most appropriate model. Missing  
512 values will be calculated as the average of day-before and day-after scores.  
513 Repeated measures ANOVA will be used to assess differences in

514 symptom recovery time between groups. A p-value less than 0.05 will  
515 determine statistical significance and all tests will be 2-sided.

516 *Provide a power analysis.* Response: We use data from a pilot study of  
517 exercise versus stretching in concussed patients<sup>19</sup> and estimated 4.2 and  
518 7.8 as the standard deviation of the days to recovery for the aerobic  
519 exercise and stretching exercise groups, respectively. We use an  
520 underlying normal distribution to simulate time to recovery data with the  
521 above standard deviations. Using a two sample two-sided t-test, we  
522 calculate an 80 percent chance to detect a clinically significant mean  
523 difference of 3.7 days in recovery time between groups with **50 subjects**  
524 **in each group.**

525 10.2

526

527 *Describe the steps that will be taken to secure the data (e.g., training,*  
528 *authorization of access, password protection, encryption, physical*  
529 *controls, certificates of confidentiality, and separation of identifiers and*  
530 *data) during storage, use, and transmission.*

531 Response:

532 **Identifiers:** The identities of all research subjects will be held in strict  
533 confidence to the extent required by law. In accordance with the Health  
534 Insurance Portability and Accountability Act, a confidential and unique  
535 subject ID number will be used to identify each subject on source  
536 worksheet forms and in all communications. Limited personal health  
537 identifiers (date of birth and dates of study visits) will appear on research  
538 materials or entered into the central electronic database.

539 The subject ID log may be viewed by a site monitor to ensure adherence to  
540 procedure but will not be removed from the site or reproduced. No names  
541 or other identifying data will be used in any report or publication of this  
542 study.

543 **Confidentiality:** The Site Investigator will assure that the privacy of  
544 subjects, including identity and medical information, will be maintained at  
545 all times. All coded data will be maintained in locked file cabinets and/or  
546 on computers equipped with security programs. Review of medical  
547 records to obtain study-related data will only occur for research purposes  
548 and will be kept confidential and de-identified within the research  
549 database. Information obtained directly from research subjects through  
550 exam, interview, monitoring equipment, or worksheet will be captured as  
551 coded research data and entered into the secure electronic database.

552 **Sharing Study Results:** To protect the integrity of this research study,  
553 individual results of screening and/or study participation will not be shared  
554 with the subject or the primary care provider. If, however, there is a  
555 medical concern identified during screening or during participation that  
556 puts the subject at medical risk, the subject will be notified and asked to

557 contact his/her primary physician. The site study PI will speak with the  
558 primary care provider if the subject provides permission to do so. After  
559 conclusion of the study, a copy of the published results may be provided to  
560 each participant.

561 *10.3 Describe any procedures that will be used for quality control of*  
562 *collected data.*

563 Response: Data entry procedures will be standardized and evaluated for  
564 fidelity. Data validation procedures such as logic checks and duplicate  
565 entry will be developed and implemented to ensure fidelity. Procedures to  
566 de-identify data and ensure confidentiality will be written and  
567 implemented.

568 *10.4 Describe how data and specimens will be handled study-wide:*

569 Response: Data will be collected electronically and transferred to secure  
570 computer databases electronically. Data will be backed up on a regular  
571 basis to each University's secure backup database. Hard copies of personal  
572 data will be filed in a locked cabinet in a locked office accessible to only  
573 the principal investigator at each site. Participant's identity will be coded  
574 and will not be associated with any published results. The code numbers  
575 and identities will be kept in a locked file of the Principal Investigator.  
576 Names, phone numbers, addresses, or any other information uniquely  
577 identifying subjects will not be written on or associated with any samples.  
578 Other parties will have only a coded Patient Identification Number.

579 Although results from this research may be published, or otherwise  
580 disclosed to outside parties, such results will not identify subjects in any  
581 way. Study subjects will be given emergency phone numbers and email  
582 addresses to contact the RAs or PIs with any questions or issues  
583 throughout the course of the study.

584 *10.5 What information will be included in that data or associated with the*  
585 *specimens?*

586 Response: All participants will be assigned a unique identification number  
587 at enrollment. This number will include a code to indicate their sequence  
588 in the enrollment process. This unique study identification number will be  
589 used by all investigators. Data on each subject will include: age, gender,  
590 date of injury, basic demographic and health information (e.g. HR, BP,  
591 Height, Weight, Gender, Age, Race, presence of certain conditions  
592 including ocular motor performance), HR and RPE for symptom  
593 exacerbation on the treadmill, daily symptom reports, daily accounts of  
594 work and school hours, and daily reports of exercise.

595 *10.6 Where and how data or specimens will be stored?*

596 Response: Information obtained directly from research subjects through  
597 exam, interview, monitoring equipment, or worksheet will be captured as  
598 coded research data and entered into the secure electronic database.

599 *10.7 How long the data or specimens will be stored?*

600 Response: Until 5 years after study conclusion.

601 *10.8 Who will have access to the data or specimens?*

602 Response: The site PIs, Co-investigators and RAs.

603 *10.9 Who is responsible for receipt or transmission of the data or*  
604 *specimens?*

605 Response: Site RAs.

606 *10.10 How data and specimens will be transported?*

607 Response: Electronically via secure email.

## 608 **11.0 Provisions to Monitor the Data and Ensure the Safety of Subjects**

609 *11.1 Describe the plan to periodically evaluate the data collected*  
610 *regarding both harms and benefits to determine whether subjects*  
611 *remain safe.*

612 Response: Subjects will meet weekly with the RAs and with the study  
613 physician and will report any problems. They can also text the RA with  
614 any problems or concerns. We will review the data once 10 subjects have  
615 completed the study to assess for any potential harm. We assume that all  
616 subjects will recover from their concussion and we will monitor daily  
617 symptom reports. If any subject appears to be deteriorating (i.e. has  
618 increased symptoms for a week or more), subject will be contacted and  
619 asked to see the treating physician.

620

621 *11.2 Describe what data are reviewed, including safety data, untoward*  
622 *events, and efficacy data.*

623 Response: The primary safety data reviewed will be the daily symptom  
624 reports as described above. We will also review the report of each  
625 treadmill test to ensure that the test is being completed in the manner  
626 found to be safe for subjects.

627 *11.3 Describe how the safety information will be collected (e.g., with case*  
628 *report forms, at study visits, by telephone calls with participants).*

629 Response: Daily symptom reports are recorded on a dedicated study  
630 website with password protection and during weekly visits with the study  
631 physicians.

632 *11.4 Describe the frequency of data collection, including when safety*  
633 *data collection starts.*

634 Response: Symptom collection starts Day 1 and continues daily until the  
635 end, at Visit 5.

636 *11.5 Describe who will review the data.*



637 Response: Study RAs, investigators and physicians.  
638 *11.6 Describe the frequency or periodicity of review of cumulative data.*  
639 Response: After every 10 subjects complete the study.  
640 *11.7 Describe the statistical tests for analyzing the safety data to*  
641 *determine whether harm is occurring.*  
642 Response: Recovery from concussion follows a fairly predictable course  
643 that includes a decrease in daily symptom scores. We will complete a  
644 cursory review of data to see if there are participants demonstrating a  
645 regular increase in symptoms and arrange to have a physician examine any  
646 subject that appears to be showing health decline.  
647 *11.8 Describe any conditions that trigger an immediate suspension of the*  
648 *research.*  
649 Response: Any SAE such as cardiac event or serious injury.

## 650 **12.0 Withdrawal of Subjects**

651 *12.1 Describe anticipated circumstances under which subjects will be*  
652 *withdrawn from the research without their consent.*  
653 Response: If subjects do not complete at least 75% of their daily symptom  
654 reports and/or if they do not complete at least 3 of 4 required treadmill  
655 tests.

656 *12.2 Describe any procedures for orderly termination.*  
657 Response: We will terminate exercise prescription for any subject that  
658 shows an extended increase in symptoms over a period of one week.  
659

660 *12.3 Describe procedures that will be followed when subjects withdraw*  
661 *from the research, including partial withdrawal from procedures*  
662 *with continued data collection.*

663 Response: Subjects that do not complete a daily symptom report will be  
664 contacted by text or phone call and reminded to report symptoms. When a  
665 subject has missed 25% of daily recording of symptoms or missed more  
666 than one clinic visit s/he will be informed that they are no longer in the  
667 study. They will also be informed that withdrawal from the study will not  
668 influence their access to medical care. We do not foresee a partial  
669 withdrawal situation. Once a subject has withdrawn from the study no  
670 further data collection will occur.

671

## 672 **13.0 Risks to Subjects**

673 *13.1 List the reasonably foreseeable risks, discomforts, hazards, or*  
674 *inconveniences to the subjects related the subjects' participation in*  
675 *the research. Include as may be useful for the IRB's consideration, a*

676  
677  
678

*description of the probability, magnitude, duration, and reversibility of the risks. Consider physical, psychological, social, legal, and economic risks.*

679  
680  
681  
682  
683  
684  
685  
686  
687  
688  
689  
690  
691  
692  
693  
694  
695  
696  
697  
698  
699  
700  
701

Response: There is a possibility of return of symptoms during exercise testing for individuals with concussion. Should this occur, the test session will be stopped immediately according to our predetermined stopping criteria (treadmill testing will be stopped once the participant reports that overall concussion symptoms have increased by  $\geq 3$  points from pre-exercise baseline on a visual analog Likert scale, or once the subject wants to stop or develops significant fatigue or breathlessness). We will not test anyone on a visit who reports a baseline Likert score  $\geq 7$  - they will be rescheduled to return on another day. In our clinical work, any exacerbation of symptoms during or after exercise testing has been temporary. During the exercise test there is a small risk of injury from falling off the treadmill, but we will not treadmill test participants if they cannot demonstrate appropriate balance. In addition, participants will perform the treadmill test under supervision of two people to minimize any risk of falling. Participants with vestibular dysfunction will perform exercise testing on a stationary bicycle. Participants may also become tired and experience muscle soreness and breathlessness common to exercising, although the exercise intensity is very low to start with and is progressed in a gradual manner. We will minimize any cardiac risk of exercise by starting at a very low exercise intensity level, by advancing exercise intensity very gradually, and by including only subjects who are at low risk for heart disease. There is no risk from a gentle progressive stretching program other than temporary muscle soreness.

702  
703  
704  
705

We have experience performing exercise tests on hundreds of individuals, and to date, no participants in our prior studies or clinical assessments have experienced adverse cardiac effects during these tests. This includes research subjects and patients.

706  
707  
708  
709  
710  
711  
712  
713

RAs will be trained in basic life support and an automatic external defibrillator (AED) will be in close proximity. We have a written emergency protocol in place. RAs will have the site PI's cell phone number and will call the PI on his cell phone to report any adverse consequences. The PI will be in the clinic or the building and readily available for any issues or problems during the exercise tests. If for some reason the PI cannot be in close proximity, he will assign a physician to be available for any questions or problems that may arise.

714  
715

*13.2 If applicable, indicate which procedures may have risks to the subjects that are currently unforeseeable.*

716

Response: Not applicable.

717  
718

*13.3 If applicable, indicate which procedures may have risks to an embryo or fetus should the subject be or become pregnant.*

719 Response: None. Low level exercise is not harmful to a pregnant female or  
720 her fetus.

721 *13.4 If applicable, describe risks to others who are not subjects.*

722 Response: Not applicable.

## 723 **14.0 Potential Benefits to Subjects**

724 *14.1 Describe the potential benefits that individual subjects may*  
725 *experience from taking part in the research. Include as may be*  
726 *useful for the IRB's consideration, the probability, magnitude, and*  
727 *duration of the potential benefits.*

728 Response:

729 The potential for direct benefit to the participant is that aerobic exercise  
730 may speed recovery. In addition, the procedures we have developed for  
731 the assessment of exercise tolerance serve as a biomarker for recovery and  
732 all subjects will benefit from the knowledge that they are physiologically  
733 recovered from concussion and ready to return to activity safely.

734 The impact that the results of the proposed research will exert on the  
735 concussion research field is to advance understanding of the physiology of  
736 concussion. If aerobic exercise speeds recovery, this would have  
737 important implications for the treatment of concussion. This could be of  
738 enormous benefit to concussion patients of all ages and circumstances.

739 *14.2 Indicate if there is no direct benefit. Do not include benefits to*  
740 *society or others.*

741 Response: Not applicable.

## 742 **15.0 Vulnerable Populations**

743 *15.1 If the research involves individuals who are vulnerable to coercion*  
744 *or undue influence, describe additional safeguards included to*  
745 *protect their rights and welfare.*

- 746 • *If the research involves pregnant women, review*  
747 *“CHECKLIST: Pregnant Women (HRP-412)” to ensure that*  
748 *you have provided sufficient information.*
- 749 • *If the research involves neonates of uncertain viability or non-*  
750 *viable neonates, review “CHECKLIST: Neonates (HRP-413)”*  
751 *or “HRP-414 – CHECKLIST: Neonates of Uncertain Viability*  
752 *(HRP-414)” to ensure that you have provided sufficient*  
753 *information.*
- 754 • *If the research involves prisoners, review “CHECKLIST:*  
755 *Prisoners (HRP-415)” to ensure that you have provided*  
756 *sufficient information.*
- 757 • *If the research involves persons who have not attained the*  
758 *legal age for consent to treatments or procedures involved in*  
759 *the research (“children”), review the “CHECKLIST: Children*

760 (HRP-416)” to ensure that you have provided sufficient  
761 information.  
762 • If the research involves cognitively impaired adults, review  
763 “CHECKLIST: Cognitively Impaired Adults (HRP-417)” to  
764 ensure that you have provided sufficient information.  
765 • Consider if other specifically targeted populations such as  
766 students, employees of a specific firm or  
767 educationally/economically disadvantaged persons are  
768 vulnerable to coercion or undue influence. The checklists  
769 listed above for other populations should be used as a guide to  
770 ensure that you have provided sufficient information.

771 Response: Children and students.

772

## 773 16.0 Community-Based Participatory Research

774 16.1 Describe involvement of the community in the design and conduct of  
775 the research.

776 Response: Not applicable.

777 Note: “Community-based Participatory Research” is a collaborative  
778 approach to research that equitably involves all partners in the  
779 research process and recognizes the unique strengths that each  
780 brings. Community-based Participatory Research begins with a  
781 research topic of importance to the community, has the aim of  
782 combining knowledge with action and achieving social change to  
783 improve health outcomes and eliminate health disparities.

## 784 17.0 Sharing of Results with Subjects

785 17.1 Describe whether or not results (study results or individual subject  
786 results, such as results of investigational diagnostic tests, genetic  
787 tests, or incidental findings) will be shared with subjects or others  
788 (e.g., the subject’s primary care physicians) and if so, describe how  
789 it will be shared.

790 Response: Subjects cannot be blinded to exercise test results. In addition,  
791 any information we gather that is useful will be shared with the treating  
792 physician with the permission/request of the subject. Information will be  
793 shared in the form of a medical report.

## 794 18.0 Setting

795 18.1 Describe the sites or locations where your research team will  
796 conduct the research.

797 Response: Concussion clinics and laboratories at UB (Farber Hall and  
798 Niagara Falls).

799 Identify where your research team will identify and recruit potential  
800 subjects.

801 Response: Patients meeting eligibility criteria at the UB concussion clinics  
802 will be asked if they are willing to meet with the RA regarding possible  
803 inclusion in a study of concussion outcomes.

804 *18.2 Identify where research procedures will be performed.*

805 Response: UB Concussion clinics at the Main Street Campus and the  
806 Niagara Falls clinic.

807 *18.3 Describe the composition and involvement of any community  
808 advisory board.*

809 Response: Not applicable.

810

811 *18.4 For research conducted outside of the organization and its affiliates  
812 describe:*

- 813 • *Site-specific regulations or customs affecting the research for*  
814 *research outside the organization.*  
815 • *Local scientific and ethical review structure outside the*  
816 *organization.*

817 Response: Not applicable.

818

## 819 **19.0 Resources Available**

820 *19.1 Describe the qualifications (e.g., training, experience, oversight) of*  
821 *you and your staff as required to perform their role. When*  
822 *applicable describe their knowledge of the local study sites, culture,*  
823 *and society. Provide enough information to convince the IRB that*  
824 *you have qualified staff for the proposed research. Note- If you*  
825 *specify a person by name, a change to that person will require prior*  
826 *approval by the IRB. If you specify people by role (e.g., coordinator,*  
827 *research assistant, co-investigator, or pharmacist), a change to that*  
828 *person will not usually require prior approval by the IRB, provided*  
829 *that person meets the qualifications described to fulfill their roles.*

830 Response: The staff at the UB study sites has extensive experience with  
831 clinical studies in concussed patients. Each site has experienced and  
832 qualified researchers and research assistants, who have recruited for,  
833 enrolled and completed multiple studies on different aspects of  
834 concussion.

835 *Describe other resources available to conduct the research: For example,*  
836 *as appropriate:*

837 *19.2 Justify the feasibility of recruiting the required number of suitable*  
838 *subjects within the agreed recruitment period. For example, how*  
839 *many potential subjects do you have access to? What percentage of*  
840 *those potential subjects do you need to recruit?*

841 Response: The UB concussion clinics see more than 100 concussion  
842 patients per year. We need to recruit approximately 50% of these subjects  
843 for purposes of the study.

844 *19.3 Describe the time that you will devote to conducting and completing*  
845 *the research.*

846 Response: we estimate that the PI and CO-I's will each devote 10% of  
847 their time to the study.

848 *19.4 Describe your facilities.*

849 Response: Each site has dedicated clinical space for the enrollment of  
850 patients, dedicated computers, as well as treadmills and exercise cycles  
851 required for the exercise testing.

852 *19.5 Describe the availability of medical or psychological resources that*  
853 *subjects might need as a result of an anticipated consequences of the*  
854 *human research.*

855 Response: They will all be under the care of clinicians (physicians,  
856 psychologists, physical therapists and other health care professionals)  
857 experienced with caring for concussed patients.

858 *19.6 Describe your process to ensure that all persons assisting with the*  
859 *research are adequately informed about the protocol, the research*  
860 *procedures, and their duties and functions.*

861 Response: All RAs and staff are required to pass the CITI course. The PI  
862 and collaborating investigators will train each RA in the process of  
863 completing the treadmill test, the neuropsychological tests on computer  
864 and all data collection procedures

865 *Prior Approvals*

866 *19.7 Describe any approvals that will be obtained prior to commencing*  
867 *the research. (E.g., school, external site, funding agency, laboratory,*  
868 *radiation safety, or biosafety approval.)*

869 Response: Not applicable.

## 870 **20.0 Recruitment Methods**

871 *20.1 Describe when, where, and how potential subjects will be recruited.*

872 Response: Physicians at both UB clinics will identify potential subjects  
873 and refer them to the study coordinator and research assistants for a  
874 description of the study and opportunity to ask questions. The potential  
875 subject will be screened against this project's Inclusion and Exclusion  
876 criteria. If the subject fits these requirements, the study coordinator will  
877 explain the project and answer questions before the subject signs the  
878 consent form. Prospective subjects and, if appropriate, the parent or LAR  
879 will have a 15 minute waiting period to consider enrollment.

880

881 20.2 Describe the source of subjects.

882 Response: The concussion clinics receive referrals from other doctors,  
883 emergency rooms, athletic trainers and self-referrals. Clinic patients  
884 satisfying inclusion criteria will be approached for participation.

885 *Describe the methods that will be used to identify potential subjects.*

886 Response:

887 Identification of potential human subjects: study physicians at each clinic  
888 will identify potential subjects with acute concussion. Athletic trainers at  
889 schools will provide interested students information to contact our RCs.

890 Recruitment: study coordinators and research assistants at each site.

891 20.3 *Describe materials that will be used to recruit subjects. (Attach*  
892 *copies of these documents with the application. For advertisements,*  
893 *attach the final copy of printed advertisements. When advertisements*  
894 *are taped for broadcast, attach the final audio/video tape. You may*  
895 *submit the wording of the advertisement prior to taping to preclude*  
896 *re-taping because of inappropriate wording, provided the IRB*  
897 *reviews the final audio/video tape.)*

898 Response: Not applicable.

899 20.4 *Describe the amount and timing of any payments to subjects.*

900 Response: Subjects will be paid \$150 for their participation. \$25 after the  
901 first visit, \$25 after the second visit, and \$100 on study completion.

902 *Local Number of Subjects*

903 20.5 *Indicate the total number of subjects to be accrued locally.*

904 Response: 110

905 20.6 *If applicable, distinguish between the number of subjects who are*  
906 *expected to be enrolled and screened, and the number of subjects*  
907 *needed to complete the research procedures (i.e., numbers of*  
908 *subjects excluding screen failures.)*

909 Response: 110 subjects to be screened and 100 subjects to complete the  
910 study.

## 911 **21.0 Confidentiality**

912 *Describe the local procedures for maintenance of confidentiality.*

913 21.1 *Where and how data or specimens will be stored locally?*

914 Response: Data will be collected and entered electronically in an excel  
915 data base. Data will be backed up on a regular basis to the University's  
916 secure backup server. Hard copies of personal data will be filed in a  
917 locked cabinet in a locked office accessible to only the principal  
918 investigator and Research Coordinator (Dr. Hinds). Participant's identity

919 will be coded and will not be associated with any published results. The  
920 code numbers and identities will be kept in a locked file accessible only by  
921 the Principal Investigator and the Research Coordinator (Dr. Hinds).  
922 Names, phone numbers, addresses, or any other information uniquely  
923 identifying subjects will not be written on or associated with any samples.  
924 Other parties will have only a coded Patient Identification Number.

925 *21.2 How long the data or specimens will be stored locally?*

926 Response: Until 5 years after the study is over.

927 *21.3 Who will have access to the data or specimens locally?*

928 Response: The site PI, Co-investigators and RAs.

929 *21.4 Who is responsible for receipt or transmission of the data or*  
930 *specimens locally?*

931 Response: The site PI, Co-investigators and RAs.

932 *21.5 How data and specimens will be transported locally?*

933 Response: On password protected computers.

## 934 **22.0 Provisions to Protect the Privacy Interests of Subjects**

935 *22.1 Describe the steps that will be taken to protect subjects' privacy*  
936 *interests. "Privacy interest" refers to a person's desire to place*  
937 *limits on whom they interact or whom they provide personal*  
938 *information.*

939 Response: Subjects will only interact with the study physicians, co-  
940 investigators and RAs.

941 *22.2 Describe what steps you will take to make the subjects feel at ease*  
942 *with the research situation in terms of the questions being asked and*  
943 *the procedures being performed. "At ease" does not refer to*  
944 *physical discomfort, but the sense of intrusiveness a subject might*  
945 *experience in response to questions, examinations, and procedures.*

946 Response: Subjects will only be asked questions that they would normally  
947 encounter in a medical visit. However, if any question or procedure  
948 appears to make a subject uncomfortable the subject will be instructed that  
949 participation in the research is entirely voluntary and they may withdraw  
950 at any time without consequences.

951 *22.3 Indicate how the research team is permitted to access any sources of*  
952 *information about the subjects.*

953 Response: Information about subjects will be obtained via subject report,  
954 behavioral observation and the medical record.

## 955 **23.0 Compensation for Research-Related Injury**

956 *23.1 If the research involves more than Minimal Risk to subjects, describe*  
957 *the available compensation in the event of research related injury.*



958 Response: Not applicable.

959 23.2 *Provide a copy of contract language, if any, relevant to*  
960 *compensation for research-related injury.*

961 Response: Not applicable.

## 962 **24.0 Economic Burden to Subjects**

963 24.1 *Describe any costs that subjects may be responsible for because of*  
964 *participation in the research.*

965 Response: None

## 966 **25.0 Consent Process**

967 25.1 *Indicate whether you will be obtaining consent*

968 Response: assent and parental permission will be obtained by the RA for  
969 participants 13 years or older but not yet 18 years of age.

970 *Describe where the consent process take place*

971 Response: In a room adjacent to the concussion clinic.

972 25.2 *Describe any waiting period available between informing the*  
973 *prospective subject and obtaining the consent.*

974 Response: prospective subjects and, if appropriate, the parent or LAR will  
975 have a 15 minute waiting period to consider enrollment.

976 25.3 *Describe any process to ensure ongoing consent.*

977 Response: This is a short term study. Not applicable.

978 25.4 *Describe whether you will be following “SOP: Informed Consent*  
979 *Process for Research (HRP-090).” If not, describe:*

- 980 • *The role of the individuals listed in the application as being*  
981 *involved in the consent process.*  
982 • *The time that will be devoted to the consent discussion.*  
983 • *Steps that will be taken to minimize the possibility of coercion*  
984 *or undue influence.*  
985 • *Steps that will be taken to ensure the subjects’ understanding.*

986 Response: We will follow “SOP: Informed Consent Process for Research  
987 (HRP-090)”.

## 988 ***Non-English Speaking Subjects***

989 25.5 *Indicate what language(s) other than English are likely to be*  
990 *spoken/understood by your prospective study population or their*  
991 *legally authorized representatives.*

992 Response: Not applicable.

993 25.6 *If subjects who do not speak English will be enrolled, describe the*  
994 *process to ensure that the oral and written information provided to*  
995 *those subjects will be in that language. Indicate the language that*  
996 *will be used by those obtaining consent.*

997 Response: Not applicable.

998 ***Waiver or Alteration of Consent Process (consent will not be obtained,***  
999 ***required information will not be disclosed, or the research involves***  
1000 ***deception)***

1001 25.7 *Review the “CHECKLIST: Waiver or Alteration of Consent Process*  
1002 *(HRP-410)” to ensure you have provided sufficient information for*  
1003 *the IRB to make these determinations. Provide any additional*  
1004 *information necessary here:*

1005 Response: Not applicable.

1006

1007 25.8 *If the research involves a waiver the consent process for planned*  
1008 *emergency research, please review the “CHECKLIST: Waiver of*  
1009 *Consent for Emergency Research (HRP-419)” to ensure you have*  
1010 *provided sufficient information for the IRB to make these*  
1011 *determinations. Provide any additional information necessary here:*

1012 Response: Not applicable.

1013

1014 ***Subjects who are not yet adults (infants, children, teenagers)***

1015 25.9 *Describe the criteria that will be used to determine whether a*  
1016 *prospective subject has not attained the legal age for consent to*  
1017 *treatments or procedures involved in the research under the*  
1018 *applicable law of the jurisdiction in which the research will be*  
1019 *conducted. (E.g., individuals under the age of 18 years.) For*  
1020 *research conducted in NY state, review “SOP: Legally Authorized*  
1021 *Representatives, Children, and Guardians (HRP-013)” to be aware*  
1022 *of which individuals in the state meet the definition of “children.”*

1023 Response: consent may only be obtained from biologic or adoptive parents  
1024 or an individual legally authorized to consent on behalf of the child to  
1025 general medical care.

1026 25.10 *For research conducted outside of NY state, provide information that*  
1027 *describes which persons have not attained the legal age for consent*  
1028 *to treatments or procedures involved the research, under the*  
1029 *applicable law of the jurisdiction in which research will be*  
1030 *conducted. One method of obtaining this information is to have a*  
1031 *legal counsel or authority review your protocol along the definition*  
1032 *of “children” in “SOP: Legally Authorized Representatives,*  
1033 *Children, and Guardians (HRP-013).”*

1034  
1035  
1036  
1037  
1038  
1039  
1040  
1041  
1042  
1043  
1044  
  
1045  
1046  
1047  
1048  
1049  
1050  
1051  
1052  
1053  
1054  
1055  
1056  
1057  
1058  
1059  
1060  
1061  
1062  
1063  
1064  
1065  
1066  
1067  
1068  
1069  
1070  
1071  
1072

Response: legal counsel or authority will review our protocol along the definition of “children” in “SOP: Legally Authorized Representatives, Children, and Guardians (HRP-013).”

*25.11 Describe whether parental permission will be obtained from:*

- *Both parents unless one parent is deceased, unknown, incompetent, or not reasonably available, or when only one parent has legal responsibility for the care and custody of the child.*
- *One parent even if the other parent is alive, known, competent, reasonably available, and shares legal responsibility for the care and custody of the child.*

Response: Since the research presents only minimal risk to children, we will obtain parental consent from one parent even if the other parent is alive, known, competent, reasonably available, and shares legal responsibility for the care and custody of the child.

*25.12 Describe whether permission will be obtained from individuals other than parents, and if so, who will be allowed to provide permission. Describe the process used to determine these individuals’ authority to consent to each child’s general medical care.*

Response: any legal guardian or parent can consent on behalf of a child. Indicate whether assent will be obtained from all, some, or none of the children. If assent will be obtained from some children, indicate which children will be required to assent.

Response: assent will be obtained from all children.

*25.13 When assent of children is obtained describe whether and how it will be documented.*

Response: it will be obtained at the time of identification as a potential subject in the presence of one of the child’s parents. The child will sign an assent form. Prospective subjects and, if appropriate, the parent or LAR will have a 15 minute waiting period to consider enrollment.

***Cognitively Impaired Adults***

*25.14 Describe the process to determine whether an individual is capable of consent. The IRB sometimes allows the person obtaining assent to document assent on the consent document and does not automatically require assent documents to be used.*

Response: Not applicable.

***Adults Unable to Consent***

1073  
1074  
1075  
1076  
1077  
1078  
1079  
1080  
1081  
1082  
1083  
1084  
1085  
1086  
1087  
1088  
1089  
1090  
1091  
1092  
1093  
1094  
1095  
1096  
1097  
1098  
1099  
1100  
1101  
1102  
1103  
1104  
1105  
1106  
1107  
1108  
1109  
1110  
1111  
1112  
1113

*When a person is not capable of consent due to cognitive impairment, a legally authorized representative should be used to provide consent and, where possible, assent of the individual should also be solicited.*

*25.15 List the individuals from whom permission will be obtained in order of priority. (e.g., durable power of attorney for health care, court appointed guardian for health care decisions, spouse, and adult child.) For research conducted in NY state, review “SOP: Legally Authorized Representatives, Children, and Guardians (HRP-013)” to be aware of which individuals in the state meet the definition of “legally authorized representative.” The list in the consent template signature section corresponds to the priority list for NYS.*

Response: Not applicable.

*25.16 For research conducted outside of NY state, provide information that describes which individuals are authorized under applicable law to consent on behalf of a prospective subject to their participation in the procedure(s) involved in this research. One method of obtaining this information is to have a legal counsel or authority review your protocol along the definition of “legally authorized representative” in “SOP: Legally Authorized Representatives, Children, and Guardians (HRP-013).”*

Response: Not applicable.

*25.17 Describe the process for assent of the subjects. Indicate whether:*

- Assent will be required of all, some, or none of the subjects. If some, indicated, which subjects will be required to assent and which will not.*
- If assent will not be obtained from some or all subjects, an explanation of why not.*
- Describe whether assent of the subjects will be documented and the process to document assent. The IRB allows the person obtaining assent to document assent on the consent document and does not routinely require assent documents and does not routinely require subjects to sign assent documents.*

Response: assent and parental permission will be obtained by the RA for participants older than 12 but not yet 18 years of age. Consent will be obtained from those who are 18 or older.

*25.18 For HUD uses provide a description of how the patient will be informed of the potential risks and benefits of the HUD and any procedures associated with its use.*

Response: Not applicable.

1114

1115 **26.0 Process to Document Consent in Writing**

1116

1117 *If your research presents no more than minimal risk of harm to subjects and*  
1118 *involves no procedures for which written documentation of consent is normally*  
1119 *required outside of the research context, the IRB will generally waive the*  
1120 *requirement to obtain written documentation of consent.*

1121 *(If you will document consent in writing, attach a consent document. If you will*  
1122 *obtain consent, but not document consent in writing, attach a consent script.*  
1123 *Review “CHECKLIST: Waiver of Written Documentation of Consent (HRP-411)”*  
1124 *to ensure that you have provided sufficient information. You may use*  
1125 *“TEMPLATE CONSENT DOCUMENT (HRP-502)” to create the consent*  
1126 *document or script.)*

1127 *26.1 Describe whether you will be following “SOP: Written*  
1128 *Documentation of Consent (HRP-091).” If not, describe whether and*  
1129 *how consent of the subject will be obtained including whether or not*  
1130 *it will be documented in writing.*

1131 *Response: We will be following “SOP: Written Documentation of*  
1132 *Consent (HRP-091).”*

1133

1134 **27.0 Drugs or Devices**

1135 *27.1 If the research involves drugs or device, describe your plans to store,*  
1136 *handle, and administer those drugs or devices so that they will be*  
1137 *used only on subjects and be used only by authorized investigators.*

1138 *Response: Not applicable.*

1139 *If the drug is investigational (has an IND) or the device has an IDE or a*  
1140 *claim of abbreviated IDE (non-significant risk device), include the*  
1141 *following information:*

1142 *27.2 Identify the holder of the IND/IDE/Abbreviated IDE.*

1143 *Response: Not applicable.*

1144

1145 *27.3 Explain procedures followed to comply with FDA sponsor*  
1146 *requirements for the following:*

| <i>FDA Regulation</i> | <i>Applicable to:</i> |                    |                                    |
|-----------------------|-----------------------|--------------------|------------------------------------|
|                       | <i>IND Studies</i>    | <i>IDE studies</i> | <i>Abbreviated<br/>IDE studies</i> |
| <i>21 CFR 11</i>      | <i>X</i>              | <i>X</i>           |                                    |
| <i>21 CFR 54</i>      | <i>X</i>              | <i>X</i>           |                                    |
| <i>21 CFR 210</i>     | <i>X</i>              |                    |                                    |
| <i>21 CFR 211</i>     | <i>X</i>              |                    |                                    |
| <i>21 CFR 312</i>     | <i>X</i>              |                    |                                    |
| <i>21 CFR 812</i>     |                       | <i>X</i>           | <i>X</i>                           |
| <i>21 CFR 820</i>     |                       | <i>X</i>           |                                    |

1147

Response: Not applicable.

## 1 **Data Analysis**

2           Analyses were based on per protocol analysis. Baseline characteristics were analyzed to  
3 assess cluster differences between aerobic and stretching groups. We assessed group-wise  
4 differences in normally distributed variables (age, total physical examination findings, total  
5 symptom severity scores on initial visit, and days to initial visit) using ANOVA. Chi-square test  
6 was used to assess group-wise differences in sex and prior concussions. The Mann-Whitney test  
7 was used for the main outcome measure (days to recovery), which was not normally distributed.  
8 This outcome was demonstrated by Kaplan-Meier curves and assessed using multivariable Cox  
9 proportional hazards models, which were adjusted for patient characteristics (age, sex, prior  
10 concussion, and time since injury) based on prior literature.<sup>34</sup> Mean daily symptom severity  
11 score with 95% CI for the first three weeks was considered in linear regression models and  
12 distributional checks of residuals were undertaken to determine the most appropriate model.  
13 Missing values were calculated as the average of day-before and day-after scores. A repeated  
14 measures ANOVA was used to assess differences in symptom recovery time between groups.  
15 A p-value less than 0.05 determined statistical significance and all tests were 2-sided. Statistical  
16 analyses were performed using STATA version 14 (College Station, Texas).

17
