# Supplementary material
Source: PubMed Central journal article supplement (PMC6450274)
Supplement: jamapediatr-173-319-s002.pdf [file jamapediatr-173-319-s002.pdf]

Leddy. Early subthreshold aerobic exercise for sport-related concussion: a randomized clinical trial. *JAMA Pediatr*. Published online February 4, 2019. doi:10.1001/jamapediatrics.2018.4397.

## **Data Sharing Statement**

### **Data**

**Data available:** Yes

**Data types:** Deidentified participant data, Data dictionary

**How to access data:** haider@buffalo.edu

**When available:** With publication

### **Supporting Documents**

**Document types:** Informed consent form

**How to access documents:** haider@buffalo.edu

**When available:** With publication

### **Additional Information**

**Who can access the data:** researchers whose proposed use of the data has been approved

**Types of analyses:** for a specified purpose

**Mechanisms of data availability:** with a signed data access agreement
